# Supplementary material for: Jasminum sambac Cell Extract as Antioxidant Booster against Skin Aging
Source: MDPI journal article supplement (doi:10.3390/antiox11122409), 2022-12-06
Supplement: s1 [file s1]

**Table S1.** Molecular formula (MF), Retention time (RT), MS data of the identified compounds in the Molecular Networks reported in Figure 2.

| Compound                          | MF<br>(Mass error ppm)                                        | RT<br>min         | Precursor ions<br>m/z | MS <sup>2</sup> ions m/z<br>(Relative<br>intensity %)                       |
|-----------------------------------|---------------------------------------------------------------|-------------------|-----------------------|-----------------------------------------------------------------------------|
| Quinic acid                       | C <sub>7</sub> H <sub>12</sub> O <sub>6</sub> (4.19<br>ppm)   | 1.97; 2.72; 14.39 | 191.0558              | 173.0445; 127.0389                                                          |
| 3-caffeoylquinic acid             | C <sub>16</sub> H <sub>18</sub> O <sub>9</sub> (5.38<br>ppm)  | 13.32             | 353.0886              | 191.0555 (100);<br>179.0343 (39.63);<br>135.0441 (23.81)                    |
| 5-caffeoylquinic acid             | C <sub>16</sub> H <sub>18</sub> O <sub>9</sub> (5.66<br>ppm)  | 14.39             | 353.0887              | 191.0554 (100);<br>179.0343 (4.18);<br>135.0441 (3.34)                      |
| 4-caffeoylquinic acid             | C <sub>16</sub> H <sub>18</sub> O <sub>9</sub> (5.10<br>ppm)  | 15.34             | 353.0885              | 191.0554 (66.37);<br>179.0342 (75.16);<br>173.0447 (100)                    |
| 5-feruloylquinic acid             | C <sub>17</sub> H <sub>20</sub> O <sub>9</sub> (5.45<br>ppm)  | 16.34             | 367.1044              | 193. 0500 (13.06);<br>191.0554 (100);<br>134.0363 (6.75)                    |
| 4-coumaroylquinic acid            | C <sub>16</sub> H <sub>18</sub> O <sub>8</sub> (6.53<br>ppm)  | 16.74             | 337.0940              | 173.0447 (100);<br>163.0392 (24.31);<br>93.0333 (14.61)                     |
| 4,5-dicaffeoylquinic acids        | C <sub>25</sub> H <sub>24</sub> O <sub>12</sub> (4.08<br>ppm) | 18.58             | 515.1205              | 353.0882 (5.67);<br>179.0342 (75.69);<br>173.0447 (100)                     |
| 3,4-dicaffeoylquinic acids        | C <sub>25</sub> H <sub>24</sub> O <sub>12</sub> (4.08<br>ppm) | 19.60             | 515.1205              | 353.0883 (4.42);<br>335.0782 (0.51);<br>179.0342 (74.88);<br>173.0447 (100) |
| 3-coumaroyl-4-caffeoylquinic acid | C <sub>25</sub> H <sub>24</sub> O <sub>11</sub> (4.81<br>ppm) | 19.80             | 499.1259              | 353.0887 (1.52);<br>173.0447 (100);<br>163.0391 (14.24);<br>119.0491 (1.49) |
| 4-caffeoyl-3-feruloylquinic acid  | C <sub>26</sub> H <sub>26</sub> O <sub>12</sub> (3.78<br>ppm) | 20.14             | 529.1361              | 353.0882 (2.42);<br>173.0447 (100);<br>134.0360 (1.52)                      |

|                                                                                          |                                                            |       |          |                                                                       |
|------------------------------------------------------------------------------------------|------------------------------------------------------------|-------|----------|-----------------------------------------------------------------------|
| <b>Caffeoyl quinic acid lactone</b><br>(or caffeoyl skimic acid)<br>mono-oxidized form   | C <sub>16</sub> H <sub>14</sub> O <sub>8</sub> (6.31 ppm)  | 14.84 | 333.0626 | 177.0186 (12.08);<br>133.0284 (100);<br>93.0334 (4.39)                |
| <b>Dicafeoyl quinic acid lactone</b><br>(or dicafeoyl skimic acid)<br>mono-oxidized form | C <sub>25</sub> H <sub>20</sub> O <sub>11</sub> (4.65 ppm) | 17.36 | 495.0945 | 177.0186 (15.72);<br>133.0285 (100);<br>93.0334 (25.26)               |
| <b>Dicafeoylquinic acid mono-oxidized form</b>                                           | C <sub>25</sub> H <sub>22</sub> O <sub>12</sub> (5.65 ppm) | 18.67 | 513.1057 | 351.0718; 177.0186<br>(22.11); 173.0447<br>(100); 133.0285<br>(42.45) |
| <b>Dicafeoylquinic acid di-oxidized form</b>                                             | C <sub>25</sub> H <sub>20</sub> O <sub>12</sub> (4.70 ppm) | 18.66 | 511.0895 | 351.0727; 177.0186<br>(7.97); 173.0447<br>(4.58); 133.0285<br>(100)   |

|                                   |                                                            |                     |          |                                                  |
|-----------------------------------|------------------------------------------------------------|---------------------|----------|--------------------------------------------------|
| <b>Feruloyl monosaccharide</b>    | C <sub>16</sub> H <sub>20</sub> O <sub>9</sub> (5.91 ppm)  | 12.15               | 355.1045 | 235.0601; 193.0499<br>(18.43); 175.0393<br>(100) |
| <b>Feruloylated disaccharides</b> | C <sub>22</sub> H <sub>30</sub> O <sub>14</sub> (3.87 ppm) | 13.62; 13.93; 14.29 | 517.1572 | 337.0929; 193.0500;<br>175.0393                  |
